1 **Full title: Social support and ideal cardiovascular health in urban Jamaica: a cross-sectional**  
2 **study**

3

4 **Short title: Social support and ideal cardiovascular health**

5

6

7 **Authors:**

8 Alphanso L. Blake<sup>1, 4</sup>, Nadia R. Bennett<sup>1</sup>, Joette A. McKenzie<sup>1</sup>, Marshall K. Tulloch-Reid<sup>1</sup>, Ishtar  
9 Govia<sup>1</sup>, Shelly R. McFarlane<sup>1</sup>, Renee Walters<sup>1</sup>, Damian K. Francis<sup>2</sup>, Rainford J. Wilks<sup>1</sup>, David R.  
10 Williams<sup>3</sup>, Novie O. Younger-Coleman<sup>1\*</sup>, Trevor S. Ferguson<sup>1\*</sup>

11

12 **INSTITUTIONS**

13 <sup>1</sup>Caribbean Institute for Health Research, The University of the West Indies, Mona, Kingston,  
14 Jamaica

15 <sup>2</sup>School of Health and Human Performance, Georgia College and State University, Milledgeville,  
16 GA, USA

17 <sup>3</sup>Department of Social and Behavioral Sciences, Harvard T. H. Chan School of Public Health,  
18 Boston, MA, USA

19 <sup>4</sup>School of Clinical Medicine and Research, The Faculty of Medical Sciences, The University of  
20 the West Indies, Nassau, The Bahamas

21

22 **Corresponding author:**

23 Trevor Ferguson

24 Email: [trevor.ferguson02@uwimona.edu.jm](mailto:trevor.ferguson02@uwimona.edu.jm)

25 \*These authors are joint senior authors on this manuscript.: TSF, NYC

26 **ABSTRACT**

27 Recent studies have suggested that high levels of social support can encourage better health  
28 behaviours and result in improved cardiovascular health. In this study we evaluated the  
29 association between social support and ideal cardiovascular health among urban Jamaicans.  
30 We conducted a cross-sectional study among urban residents in Jamaica's south-east health  
31 region. Socio-demographic data and information on cigarette smoking, physical activity, dietary  
32 practices, blood pressure, body size, cholesterol, and glucose, were collected by trained  
33 personnel. The outcome variable, ideal cardiovascular health, was defined as having optimal  
34 levels of  $\geq 5$  of these characteristics (ICH-5) according to the American Heart Association  
35 definitions. Social support exposure variables included number of friends (network size),  
36 number of friends willing to provide loans (instrumental support) and number of friends  
37 providing advice (informational support). Principal component analysis was used to create a  
38 social support score using these three variables. Survey-weighted logistic regression models  
39 were used to evaluate the association between ICH-5 and social support score.  
40 Analyses included 841 participants (279 males, 562 females) with mean age of  $47.6 \pm 18.42$   
41 years. ICH-5 prevalence was 26.6% (95%CI 22.3, 31.0) with no significant sex difference (male  
42 27.5%, female 25.7%). In sex-specific, multivariable logistic regression models, social support  
43 score, was inversely associated with ICH-5 among males (OR 0.67 [95%CI 0.51, 0.89],  $p=0.006$ )  
44 but directly associated among females (OR 1.26 [95%CI 1.04, 1.53],  $p=0.020$ ) after adjusting for  
45 age and community SES. Living in poorer communities was also significantly associated with  
46 higher odds of ICH-5 among males, while living communities with high property value was  
47 associated with higher odds of ICH among females.  
48 In this study, higher level of social support was associated with better cardiovascular health  
49 among women, but poorer cardiovascular health among men in urban Jamaica. Further  
50 research should explore these associations and identify appropriate interventions to promote  
51 cardiovascular health.

## 52 INTRODUCTION

53 Cardiovascular disease (CVD), manifesting clinically as coronary heart disease, cerebrovascular  
54 disease, and peripheral arterial disease, remains the leading cause of morbidity and mortality  
55 globally (1, 2). The prevalence of CVDs increased two-fold from 1990 to 2019, from 271 million  
56 to 523 million cases globally (3). Additionally, there was a 50% increase in deaths from 12.1 to  
57 18.6 million over the same period (4). Social determinants of health, such as socioeconomic  
58 position, poverty, social networks, and access to health care services (5), continue to be among  
59 the major contributors to cardiovascular diseases (3). Some experts project a further increase in  
60 the prevalence of CVD in several world regions, including the Caribbean, where there is an  
61 expected doubling in the geriatric population over the next thirty years (6).

62 Several risk factors for CVDs have been recognised, including seven factors identified in the  
63 American Heart Association (AHA) “Life’s Simple 7” programme: high blood pressure, high  
64 cholesterol, high blood sugar, physical inactivity, unhealthy diet, overweight/obesity and  
65 cigarette smoking (7). The AHA also reported that maintaining the recommended levels of  
66 these characteristics will reduce morbidity and mortality from CVD and other conditions (8, 9).  
67 Having the recommended levels of these seven characteristics have been used to define the  
68 construct of ideal cardiovascular health (ICH). This concept was introduced by the AHA in 2010  
69 to refer to the absence of CVD and normal levels of key risk factors, namely normal blood  
70 pressure, normal glucose, normal cholesterol, normal weight, healthy diet, physical activity of  
71 at least 150 minutes per week and current non-smoking status (8). This framework for  
72 preventing cardiovascular disease and promoting cardiovascular health is largely based on the  
73 principles of primary prevention (10). The risk factors for CVD were categorized into two  
74 groups, with four ideal health behaviours, consisting of four behavioural risk factors including  
75 smoking status, normal weight, adequate physical activity, and healthy diet, and three  
76 biological factors, namely, blood pressure, cholesterol, and glucose. In 2022, the AHA updated  
77 its construct of cardiovascular health and included sleep as an additional behavioural risk  
78 factor; the construct which was conceptualized after completion of data collection for this  
79 study and has now been rebranded as “Life’s Essential 8” instead of the former “Life’s Simple

80 7”(11). AHA stated that people can improve these factors through lifestyle and behaviour  
81 changes.

82 In urban Jamaica, ICH prevalence is low, with only 0.5% having all 7 characteristics and 23%  
83 having 5 or more in persons 20 years and older (12). Other countries report a similarly low  
84 prevalence of ICH, ranging from 0.1% having all 7 ICH characteristics in the Republic of Serbia  
85 (13) to 3.3% having all seven ICH characteristics in Malawi (14).

86 Recent studies have suggested that having quality relationships is associated with better health  
87 outcomes, inclusive of cardiovascular disease and its risk factors (15-17). Possible mechanisms  
88 for these associations include social support systems that may act as a buffer to stressors which  
89 compound an individual’s medical condition (18, 19) Social support refers to the functions or  
90 provisions given by one’s social relationships such as emotional concern, instrumental  
91 assistance, or information (18-20). Social support involves an exchange of resources between a  
92 minimum of two individuals to benefit one of the individuals (21, 22). It usually comprises the  
93 structural aspect of an individual’s social life and the functions they seek to serve (23). Social  
94 support becomes important in cardiovascular events as it acts as a buffer to the debilitating  
95 effects of stress induced cardiovascular reactivity (23). Gottlieb emphasized that researchers in  
96 behavioural medicine and psychology have focused on social support for two main reasons  
97 (15). Firstly, it plays an integral role in moderating the effects of life stress and well-being and  
98 secondly, it plays a key role in stress relief and adjustment in stressed individuals (15, 24). Given  
99 these findings, social support ought to be a fundamental principle of health promotion since it  
100 is expected to encourage healthier behaviours and potentially improve health outcomes (15).

101 A major concept in the application of social support is social embeddedness (25). This refers to  
102 the degree to which individuals are interconnected and embedded within communities as  
103 described by Berkman and Krishna (26) Social embeddedness is often measured by social  
104 network size, i.e., the number of persons with whom one is socially connected. Social network  
105 analysis usually focus more on the pattern of ties between persons in a social system rather  
106 than on the characteristics of the persons involved (26)

107 There is a growing interest among researchers regarding how social network factors interact  
108 with cardiovascular health (27). Research has also shown that social networks can have an  
109 important effect on physical health and that among older adults, the number of friends (social  
110 network size) may influence cardiovascular health, with larger number of friends being  
111 associated with better CVD risks (18, 28). Research has shown that lack of social support is  
112 associated with an increase in cardiovascular risk, with odds ratios ranging from 2 to 3 (29).  
113 Higher social support has also been shown to be associated with reduced mortality,  
114 improvement in health and an overall greater quality of life (22). In one study, Harding and  
115 colleagues found that high levels of functional social support was associated with lower risk of  
116 incident hypertension among participants in the Jackson Heart Study (30). There is therefore  
117 evidence to support the notion that certain types of social support are associated with  
118 improved outcomes in cardiovascular conditions (30).

119  
120 Although research has shown that social support may play an important role in the risk of  
121 cardiovascular diseases, little is known with regards to its relationship with cardiovascular  
122 health. Additionally, to our knowledge, no previous research on social support and  
123 cardiovascular health has been conducted in Jamaica. This study therefore aims to evaluate the  
124 relationship between social support and ideal cardiovascular health among persons living in  
125 urban Jamaica, a middle-income developing country.

126

## 127 **METHODS**

### 128 *Data sources*

129 We conducted a primary cross-sectional study in urban communities from four parishes in  
130 Jamaica's southeast health region. The included parishes were Kingston, St Andrew, St  
131 Catherine, and St Thomas, representing almost 50% of the Jamaican population. Figure S1 in  
132 the appendix shows a map of the included parishes and Jamaica's health regions. The included  
133 parishes provide a mix of urban communities, encompassing low-, middle-, and upper-income  
134 communities. The present study reports on one component of a study evaluating the impact of

135 psychosocial stress, social networks, and social support on cardiovascular health in urban  
136 communities in Jamaica. Details concerning the research protocol and methods have been  
137 previously published (12, 31). The data collection began on June 18, 2018, and ended on July 1,  
138 2019. The study recruited participants from the 2016/2017 Jamaica Health and Lifestyle Survey  
139 (JHLS-III) or individuals living in one of the communities previously surveyed in JHLS-III and aged  
140 15 years or older. We included non-institutionalized Jamaicans who were resident in the  
141 selected communities and excluded persons who were unable to comprehend the questions  
142 included in the questionnaire. We used a multi-stage sampling design with primary sampling  
143 units being randomly selected from Enumeration Districts (ED) in Jamaica. EDs are  
144 administrative divisions, consisting of approximately 100-150 households. Within each ED  
145 twenty households were selected using systematic sampling with sampling intervals based on  
146 the number of households in the ED and a random starting point provided by the Statistical  
147 Institute of Jamaica. Within each household one participant was selected using the Kish method  
148 (32). This involved creating a schedule of all the occupants of the household starting with all  
149 males and then all females from oldest to youngest. Based on the number of eligible  
150 individuals, a random person was selected from each household to complete the survey using a  
151 random selection table. We aimed to recruit 20 participants from each of 44 EDs for a total  
152 sample size of 880. We recruited 849 participants from 1130 persons approached resulting in a  
153 response rate of 75%.

154 The study was approved by the Mona Campus Research Ethics Committee of the University of  
155 the West Indies (Ethical approval # ECP 89 16/17). All participants, including those 15-19 years  
156 old, provided written informed consent, based on procedures approved by the Ethics  
157 Committee.

### 158 *Measurements*

159 Data on demographic characteristics, cigarette smoking, physical activity and dietary practices  
160 were collected using interviewer administered questionnaires in face-to-face interviews.

161 Social support items for the questionnaire were adapted from the Chicago Community Adult  
162 Health Study (CCAHS). This questionnaire is now available in the public domain (33). We  
163 followed the methods used by Viruell-Fuentes and colleagues (34) based on three questions:

- 164 i) network size based on answers to the question: “How many close friends and  
165 relatives do you have (people that you feel at ease with, can talk to about  
166 private matters, and can call on for help)?”
- 167 ii) instrumental support using the question: “How many friends and relatives do  
168 you have to whom you can turn when you need to borrow something like a  
169 household object or a small amount of money or need help with an errand?”
- 170 iii) iii) informational support from the question: “How many friends and relatives  
171 do you have who you can ask for advice or information?”.

172 All questions required a single numeric value. For descriptive analyses, the questions were  
173 reported separately. For analytic models, a score was created using Principal Component  
174 Analysis (PCA) as described below.

175 Blood pressure was measured using an oscillometric device (Omron 5 series blood pressure  
176 monitor, Omron Healthcare, Lake Forest, IL). These devices do not require recalibration but  
177 were checked regularly to ensure all components were functioning properly. Measurements  
178 were performed in the morning (typically between 7:00 am and 9:00 am). Three blood pressure  
179 measurements were taken using the right arm of the seated participant and followed  
180 standardized procedures developed for the International Collaborative Study of Hypertension in  
181 Blacks (35). The means of the second and third systolic blood pressure (SBP) and diastolic blood  
182 pressure (DBP) measurements were used in the analyses. Weight was measured using a  
183 portable digital scale (Tanita HD-351 Digital Weight Scale, Tanita Corporation, Tokyo, Japan)  
184 and recorded to the nearest 0.1 kg. Height was measured using a portable stadiometer (Seca  
185 213 Mobile stadiometer, Seca GmbH & Co., Hamburg, Germany) and recorded to the nearest  
186 0.1 cm. To ensure reliable measurements, field staff were trained and certified to perform  
187 Blood Pressure (BP) and anthropometric measurements prior to starting fieldwork and at three-

188 month intervals. Fasting glucose and total cholesterol were measured from a capillary blood  
189 sample using a point of care device (SD LipidoCare, Suwon, South Korea).

### 190 *ICH variables*

191 The seven ICH categories were defined using the standards of the American Heart Association  
192 (7). We did not have specific data on treatment for hypertension, diabetes mellitus or  
193 hypercholesterolemia, so for these characteristics a report of doctor diagnosed was used  
194 instead of treatment for the condition. Normal blood pressure was defined as SBP less than 120  
195 mm Hg and DBP less than 80 mm Hg among persons who were not previously diagnosed with  
196 hypertension. Normal body mass index (BMI) was defined as BMI less than 25.0 kg/m<sup>2</sup>. Normal  
197 glucose was defined as a fasting glucose level of less than 5.6 mmol/L among persons who were  
198 not previously diagnosed with diabetes. Normal cholesterol was defined as less than 5.2  
199 mmol/L among persons who were not previously diagnosed with hypercholesterolaemia.  
200 Current non-smokers were defined as persons who reported never smoking or have quit  
201 smoking for more than 12 months. Engaging in 150 minutes of moderate physical activity or 75  
202 minutes of vigorous physical activity per week was defined as adequate physical activity for  
203 adults 20 years or older, while for participants 15-19 years adequate physical activity was  
204 defined as 60 or more minutes of physical activity per day. Participants were classified as having  
205 healthy diet if they had three or more of the dietary characteristics below:

- 206 • Low salt defined as no salt added at the table and rarely or never eating processed food.
- 207 • Low sugar-sweetened beverage (SSB) consumption defined as having SSB less than  
208 twice per week.
- 209 • Adequate fruit and vegetable consumption defined as having fruits or vegetables three  
210 or more times per day.
- 211 • Adequate fish consumption as having fish two or more times per week.

212 Except for physical activity, we used the same criteria to classify ICH characteristics for those  
213 15-19 years and those 20 years and older. Although the AHA criteria suggest that BMI and BP  
214 for persons 12-19 years should be classified using the 85<sup>th</sup> and 90<sup>th</sup> centile respectively, we  
215 found that these cut points for those 15-19 years in our study would result in values higher than



216 the cut points for normal used for adults (85<sup>th</sup> centile for BMI was 26.6 kg/m<sup>2</sup>, while the 90<sup>th</sup>  
217 centile for SBP was 127.9 mmHg and for DBP 81.8 mmHg).

218

219 Baseline socioeconomic status (SES) characteristics included participants' educational  
220 attainment; this was categorized as:

- 221 • "Less than high school" for persons with no formal education or up to grade 8
- 222 • "High school" for persons who would have attained formal education up to grades 9 –  
223 13.
- 224 • "More than high school" for persons with post-secondary education at college,  
225 university, or vocational training institutions.

226 This was used as an individual level socioeconomic status (12).

227 Unimproved land value for each property for the communities selected for the survey were  
228 obtained from Jamaica's National Land Agency (NLA). Community property values were  
229 classified using the median property value for each community as a summary measure of the  
230 socioeconomic status for that community. The median property values were ordered and  
231 distinguished into rural and urban categories and then divided into tertiles, namely, lower,  
232 middle, and upper categories. Only urban communities were included in this study. Details on  
233 the use of this metric in the Jamaican context have been previously published (12).

234 Poverty was defined using the Planning Institute of Jamaica (PIOJ) Poverty Map data base (36).  
235 Levels of poverty were estimated based on household consumption patterns quoted in  
236 Jamaican dollars per adult across 14 parishes and 767 communities of the country. This  
237 approach provided a Poverty headcount, estimated using a measure of consumption which  
238 compared the values of the food poverty line with the value of the total poverty line (36). The  
239 food poverty line represents the cost of the food basket which consists of a minimum  
240 nutritional requirement of kilocalories per family. The total poverty line consists of the food  
241 basket which is added to non-food items such as transport cost, clothing, health, educational  
242 and personal expenses (36). For this analysis communities were ranked according to total

243 poverty and categorized into lower, middle, and upper tertiles, such that those in the upper  
244 tertile have the highest level of poverty.

#### 245 *Sample size and power*

246 Sample size and power calculations were performed using Stata 16.1. We estimated the power  
247 based on an available sample of 841 study participants. To account for the complex survey  
248 design and the fact that the analyses will use survey analytic methods, we estimated a design  
249 effect factor and used this to estimate an effective sample size for the study (37, 38). The  
250 design effect was estimated as the ratio of the variance for the proportion of participants with  
251 five ICH components in a previous national survey Jamaica Health and Lifestyle Survey 2007-  
252 2008 (JHLS-II) with and without adjustment for survey sampling design, as detailed in our study  
253 protocol (31, 39). This was found to be 2.6; a similar estimate of the design effect was found  
254 when other outcomes were used. Based on this design effect, our effective sample size was  
255 estimated to 324 (i.e.,  $841/2.6$ ) for this study. We did not have estimates of the variation of ICH  
256 by social support groups, but we estimated power based on possible odds ratios of 1.5 to 2.5  
257 per unit increase in social support score (which is assumed to follow the Normal distribution  
258 while prevalence of ICH at mean support score is assumed to be 0.23). The effective sample of  
259 324 has power of 81% to estimate an odds ratio (OR) of 1.5 using logistic regression ( $\alpha = 0.05$   
260 two-sided) and 99% to detect an OR of 2.5 in similar models.

#### 261 *Statistical approaches*

262 Statistical analyses were done using Stata version 16.1. Community-specific data inclusive of  
263 land value and poverty data were identified from the National Land Agency (NLA) and the  
264 Statistical Institute of Jamaica (STATIN) respectively, these were merged into the primary study  
265 dataset. Given that social support was assessed using three correlated variables (network size,  
266 instrumental support, informational support), we used principal components analysis (PCA) to  
267 derive a score combining the three variables. Kaiser-Meyer-Olkin (KMO) measure of sampling  
268 adequacy was used to determine the suitability of the variables for use in PCA, with KMO  
269 greater than 0.5 seen as significant (40). KMO for the three variables included was 0.739, thus  
270 adequate for use in PCA. Horn's parallel analysis method was then used to select the PCA

271 components for use in the analysis (41, 42). This yielded a single PCA component with  
272 Eigenvalue of 2.37 explaining 81% of the variance in the three variables. PCA scores were used  
273 in bivariate and multivariable analysis to assess the association between ideal cardiovascular  
274 health and social support.

#### 275 *Outcome and exposure variables*

276 The prevalence of all seven ICH characteristics have been found to be low in many populations,  
277 as such, investigators have used an operationalized definition of having five or more  
278 characteristics to determine ICH outcome as outlined in our study protocol and a previous  
279 publication from this study (12, 31). Considering this we decided *a priori* to use having five or  
280 more ICH components as the main outcome variable in evaluating associations. The main  
281 exposure variable was social support score as defined above. Covariates and potential  
282 confounders assessed included age, sex, and measures of SES variables (education level,  
283 median community property value and community poverty).

284 T-tests were used to identify differences in means and Chi-squared and Fisher's exact used to  
285 identify differences in proportions. A p-value less than 0.05 was considered statistically  
286 significant for analyses. Logistic regression models were used to assess bivariate and  
287 multivariable associations.

#### 288 *Survey Weighted Analyses*

289 Analyses were weighted to account for the multistage sampling used in the survey design.  
290 Sampling weights were calculated using the inverse of the probability of selecting a dwelling  
291 from which a single respondent was selected and corrected for the probability of refusal to  
292 participate in the study. Weights were further calibrated using post-stratification weights to  
293 correct for the distribution of the sample as compared to the distribution of the target  
294 population as done in previous national surveys (43, 44)

#### 295 *Missing data*

296 Missing data were handled using multiple imputation. The total dataset included 849  
297 participants. Analyses were limited to 841 participants who had data on age, sex, and survey

298 weights. Missing data for other variables were filled in using multiple imputation by chained  
299 equations using Stata software's suite of multiple imputation commands (45). For the variables  
300 included in the analyses for this paper 727 participants had full data and 114 participants had  
301 data for at least one variable missing. The total fraction of missing data was 13.5%, with the  
302 largest proportion of missing for a single variable being 6.4%. We therefore chose to do 20  
303 imputations based on recommendations from Graham et al (46).

#### 304 *Inclusivity in Global Research*

305 Additional information regarding the ethical, cultural, and scientific considerations specific to  
306 inclusivity in global research is included in the Supporting Information (S1 Checklist).

307

## 308 **RESULTS**

309 Unweighted summary statistics for participants characteristics by sex are presented in Table 1.  
310 The analysed sample included 841 participants with an overall mean age of  $47.6 \pm 18.4$  years;  
311 this included 562 females and 279 males. Weighted estimates are shown in Table S1 in the  
312 appendix. Tables S2A and S2B in the appendix illustrates how the sample weights correct for  
313 differences in the age sex distribution of the sample when compared to the Jamaica's urban  
314 population.

315 The mean height was  $165.5 \pm 9.7$  cm, and the mean weight was  $78.5 \pm 23.0$  kg; females  
316 weighed significantly more than males ( $79.7$  kg vs.  $76.0$  kg;  $p=0.029$ ). The mean overall BMI was  
317  $28.7 \pm 8.4$  kg/m<sup>2</sup>; females ( $30.4$  kg/m<sup>2</sup>) had significantly higher BMI than males ( $25.4$  kg/m<sup>2</sup>),  
318  $p \leq 0.001$ . Mean systolic blood pressure (SBP) was  $130.9 \pm 22.5$  mmHg. For the diastolic blood  
319 pressure (DBP), the overall mean was  $84.4 \pm 13.5$  mmHg with no significant variation by sex  
320 ( $p=0.787$ ). Mean fasting blood glucose level was  $5.9 \pm 2.31$  mmol/l ( $106.3 \pm 35.1$  mg/dl). Mean  
321 total cholesterol level was  $4.4 \pm 1.2$  mmol/l ( $170.1 \pm 46.0$  mg/dl); females ( $4.5$  mmol/l [ $174.0$   
322 mg/dl]) had significantly higher total cholesterol levels than males ( $4.2$  mmol/l [ $163.4$ mg/dl]),  
323  $p=0.002$ . The mean ICH score was  $3.22 \pm 1.28$ , with females having significantly lower scores

324 than males. Mean PCA derived social support score was  $0.0 \pm 1.56$  and was significantly higher  
325 for males.

326 There were no significant sex differences in SES characteristics. For education categories, 51.9%  
327 of persons had high school level, while 25.8% had more than high school education and 22.4%  
328 had less than high school education. The mean median land value was 1.63 million JMD overall  
329 [females, 1.64M vs males, 1.62M] (p-value for male vs. female = 0.890). The highest percentage  
330 (54%) of persons were in the lower land value category, 27% were in the middle category and  
331 17% in the upper category. The highest proportion of persons were in the upper category of  
332 total poverty (44.9%), the middle category had 19.4% and the lower category had 35.7%.

333 **Table 1 – Unweighted mean values and proportions for participant characteristics by sex**

| Characteristics              | n<br>(Male/Female) | Male<br>n= 279 | Female<br>n= 562 | Total<br>n= 841 | P-values<br>for sex<br>difference |
|------------------------------|--------------------|----------------|------------------|-----------------|-----------------------------------|
| <b>Continuous Variables</b>  |                    |                |                  |                 |                                   |
|                              |                    | Mean ± SD      | Mean ± SD        | Mean ± SD       |                                   |
| Age (years)                  | 841 (279/562)      | 46.6 ± 19.2    | 48.2 ± 18.1      | 47.6 ± 18.4     | 0.246                             |
| Height (cm)                  | 811 (268/543)      | 173.0 ± 8.3    | 161.7 ± 8.0      | 165.5 ± 9.7     | <0.001                            |
| Weight (kg)                  | 817 (269/548)      | 76.1 ± 21.7    | 79.7 ± 23.5      | 78.5 ± 23.0     | 0.029                             |
| BMI (kg/m <sup>2</sup> )     | 808 (267/541)      | 25.4 ± 7.2     | 30.4 ± 8.5       | 28.7 ± 8.4      | <0.001                            |
| SBP (mmHg)                   | 822 (270/552)      | 132.9 ± 21.1   | 129.9 ± 23.1     | 130.9 ± 22.5    | 0.067                             |
| DBP (mmHg)                   | 822 (270/552)      | 84.2 ± 14.1    | 84.47 ± 13.3     | 84.4 ± 13.5     | 0.787                             |
| Fasting Glucose              |                    |                |                  |                 |                                   |
| SI Units (mmol/l)            | 799 (261/538)      | 5.8 ± 2.0      | 6.0 ± 2.5        | 5.9 ± 2.3       | 0.191                             |
| US Units (mg/dl)             |                    | (104.5 ± 35.1) | (108.3 ± 44.1)   | (107.0 ± 41.6)  |                                   |
| Total Cholesterol            |                    |                |                  |                 |                                   |
| SI Units (mmol/l)            | 798 (262/536)      | 4.2 ± 1.2      | 4.5 ± 1.2        | 4.4 ± 1.2       | 0.002                             |
| US Unit (mg/dl)              |                    | (162.8 ± 44.9) | (173.2 ± 46.0)   | (169.8 ± 46.0)  |                                   |
| Total ICH score*             | 755 (250/505)      | 3.4 ± 1.2      | 3.1 ± 1.3        | 3.2 ± 1.3       | 0.002                             |
| Social support score (PCA)   | 835 (277/558)      | 0.29 ± 1.76    | -0.14 ± 1.43     | 0.0 ± 1.56      | <0.001                            |
| <b>Categorical Variables</b> |                    |                |                  |                 |                                   |
|                              |                    | n (%)          | n (%)            | n (%)           |                                   |
| Education                    | 831 (278/553)      |                |                  |                 | 0.962                             |
| Less than High School        |                    | 61 (21.9)      | 125 (22.6)       | 186 (22.4)      |                                   |
| High School                  |                    | 144 (51.8)     | 287 (51.9)       | 431 (51.9)      |                                   |
| More than High School        |                    | 73 (26.7)      | 141 (25.0)       | 214 (25.8)      |                                   |
| Median Land Value            | 837 (276/561)      |                |                  |                 | 0.598                             |
| Lower Tertile                |                    | 146 (52.9)     | 312 (55.6)       | 458 (54.7)      |                                   |
| Middle Tertile               |                    | 83 (30.1)      | 150 (26.7)       | 233 (27.8)      |                                   |
| Upper Tertile                |                    | 47 (17.0)      | 99 (17.7)        | 146 (17.4)      |                                   |
| Community Poverty            | 837 (276/561)      |                |                  |                 | 0.252                             |
| Lower Tertile                |                    | 109 (39.5)     | 190 (33.9)       | 299 (35.7)      |                                   |
| Middle Tertile               |                    | 48 (17.4)      | 114 (20.3)       | 162 (19.4)      |                                   |
| Lower Tertile                |                    | 119 (43.1)     | 257 (45.8)       | 376 (44.9)      |                                   |

334 \*ICH = ideal cardiovascular health. Score = number of individual characteristics that each  
335 participant has. The score excludes participant with missing values of any of the seven ICH  
336 variables.

337 PCA = Principal Component Analysis

338 Figure 1 shows the median distribution of social support/network characteristics for study  
339 participants. The median friend number size was 4, males had a median value of 5 and females  
340 had a median of 4 friends. For instrumental support, the median number was 3 persons, males  
341 had a median of 4 while females had a median of 3 persons. Median value for informational  
342 support was 4 overall; males had a median score of 5 and females had 4 persons.

343 Prevalence of the individual ICH components and proportion of those with five or more  
344 components (ICH-5) is shown in Table 2. The highest prevalence was seen for current non-  
345 smokers at 81% and lowest prevalence for healthy diet at 19%. A higher proportion of males  
346 (45%) had normal BMI compared to females (28%); males (52%) also had a higher proportion  
347 with adequate physical activity level compared to females (30%).

348 The distribution of number of ICH variables and percent of participants with  $\geq 1$ ,  $\geq 2$ ,  $\geq 3$ ,  $\geq 4$ ,  $\geq 5$ ,  
349  $\geq 6$  or 7 components is shown in Figure 2. The modal number of ICH variables was 3 with 31% of  
350 participants having 3 characteristics. None of the participants had all seven ICH characteristics.  
351 Prevalence of 5 or more components was 26.6% (95% CI 22.3 – 31.0); males 25.7%, females  
352 27.5% (see Table 2). There was no significant difference in the prevalence of ICH by sex.

353 Prevalence of ICH-5 by tertiles of social support score and SES variables is shown in Table S3 in  
354 the appendix. While there were no significant differences in the prevalence of ICH-5 by social  
355 support score tertiles for males and females combined, ICH-5 prevalence was highest among  
356 males in the lowest social support score tertile in sex-specific estimates. Prevalence of ICH-5  
357 also showed significant associations with education and median land value for the total group  
358 and among males, but not among females. As shown in Table S4 in the appendix, mean social  
359 support score varied significantly with SES characteristics.

360 Prevalence of individual ICH components by categories of social support score and SES  
361 characteristics is shown in Table S5 and S6 in the appendix. For education levels, significant  
362 associations were seen for non-smoker, normal glucose, normal blood pressure and normal  
363 cholesterol. For median land value tertiles there were significant associations for normal BMI,  
364 adequate physical activity, and normal cholesterol. Normal glucose, healthy diet and normal  
365 cholesterol were associated with community poverty tertiles. When assessed by tertiles of

366 social support score, the only statistically significant associations were for non-smoker and  
 367 normal cholesterol among females (see Table S6).

368 **Table 2: Prevalence estimates of Ideal Cardiovascular Health (ICH) characteristics by Sex**

| Characteristics                | Males + Females<br>N = 841<br>% (95% CI) | Males<br>n=279<br>% (95% CI) | Females<br>n = 562<br>% (95% CI) |
|--------------------------------|------------------------------------------|------------------------------|----------------------------------|
| BMI normal ***                 | 36 (32 – 40)                             | 45 (38 – 51)                 | 28 (23 – 32)                     |
| Non-smoker ***                 | 81 (77 – 85)                             | 72 (66 – 78)                 | 89 (86 – 92)                     |
| Glucose Normal                 | 68 (62 – 74)                             | 67 (59 – 74)                 | 68 (62 – 75)                     |
| Normal BP **                   | 34 (29 – 40)                             | 29 (24 – 35)                 | 39 (33 – 46)                     |
| Adequate physical activity *** | 41 (36 – 45)                             | 52 (46 – 57)                 | 30 (24 – 37)                     |
| Healthy diet                   | 19 (16 – 22)                             | 16 (12 – 20)                 | 22 (18 – 26)                     |
| Cholesterol Normal             | 79 (75 – 82)                             | 79 (73 – 85)                 | 78 (74 – 82)                     |
| <b>≥5 ICH Characteristics</b>  | <b>26.6 (22.3 - 31.0)</b>                | <b>25.7 (20.1 – 31.3)</b>    | <b>27.5 (22.8 – 32.3)</b>        |

369 CI = Confidence interval; ICH = ideal cardiovascular health  
 370 \*p ≤0.05; \*\*p ≤0.01; \*\*\*p≤0.001  
 371 Normal BP = 120/80; Normal BMI < 25.0 kg/m<sup>2</sup>; Normal glucose <5.6 mmol/L; Normal cholesterol <5.2 mmol/L; Adequate  
 372 physical activity = 150 mins of moderate physical activity weekly or 75 mins of vigorous physical activity weekly; Non-smoking =  
 373 never smoking or quit more than 12 months ago  
 374  
 375

376 Table 3 displays odds ratios (95%CI) from bivariate analysis of the association between ICH-5,  
 377 the outcome variable, and covariates among males and females combined and stratified by sex.  
 378 We also report p-values for sex interaction. Odds of ICH-5 were lower among men with higher  
 379 social support (OR (95% CI) = 0.69 (0.52 – 0.91); p=0.010)) There was no significant association  
 380 for females (p=0.272). Men with high school education, had the higher odds of ICH-5 (OR (95%  
 381 CI=2.48 (1.48 – 4.15); p=0.001). The odds of ICH-5 were again higher for men with more than  
 382 high school education and for women with high school or more than high school education, but  
 383 these were not statistically significant. Odds of ICH-5 were lower among men in the middle land  
 384 value category ICH5 (OR (95% CI) =0.46 (0.25 – 0.83); p=0.012; associations in the other  
 385 categories were not statistically significant. There was significant sex-interaction in the  
 386 association between ICH and social support score (p=0.003), therefore we used sex-specific  
 387 multivariable models.



388 **Table 3: Combined and Sex-specific bivariate model showing the odds ratios for five or more ideal**  
 389 **cardiovascular health characteristics (ICH-5) unit associated with change in age and social support score**  
 390 **and categories of socioeconomic variables.**

| Variables             | Males and Females<br>Odds ratio (95% CI) | Males<br>Odds ratio (95% CI) | Females<br>Odds ratio (95% CI) | P-value for sex interaction |
|-----------------------|------------------------------------------|------------------------------|--------------------------------|-----------------------------|
| Age                   | 0.96 (0.94 – 0.97) ***                   | 0.97 (0.94 – 0.99) **        | 0.95 (0.92 – 0.97) ***         | 0.118                       |
| Social Support Score  | 0.87 (0.75 – 1.00)                       | 0.69 (0.52 – 0.91) *         | 1.10 (0.98 – 1.29)             | 0.003                       |
| Education Categories  |                                          |                              |                                |                             |
| Less than High School | Reference                                | Reference                    | Reference                      |                             |
| High School           | 2.15 (1.20 -3.85)                        | 2.48 (1.48 – 4.15) **        | 1.88 (0.59 – 5.97)             | 0.682                       |
| More than High School | 1.89 (1.03 – 3.45)                       | 1.30 (0.61 – 2.76)           | 2.50 (0.98 – 6.31)             | 0.261                       |
| Land Value Categories |                                          |                              |                                |                             |
| Lower Category        | Reference                                | Reference                    | Reference                      |                             |
| Middle Category       | 0.54 (0.35 – 0.84) **                    | 0.46 (0.25 – 0.83) *         | 0.64 (0.39 – 1.05)             | 0.311                       |
| Upper Category        | 0.95 (0.50 – 1.80)                       | 0.92 (0.42 – 2.03)           | 0.98 (0.46 – 2.06)             | 0.888                       |
| Community Poverty     |                                          |                              |                                |                             |
| Lower Category        | Reference                                | Reference                    | Reference                      |                             |
| Middle Category       | 1.05 (0.67 – 1.64)                       | 1.18 (0.56 – 2.51)           | 0.93 (0.48 – 1.80)             | 0.656                       |
| Upper Category        | 1.82 (1.09 – 3.03) *                     | 2.00 (1.06 – 3.78) *         | 1.65 (0.85 – 3.20)             | 0.630                       |

391 \*p<0.05; \*\*p<0.01; p<0.001

392 We also ran bivariate models for the individual ICH components as outcome variables with  
 393 social support score as the exposure. The results for these models are shown in Table S7 in the  
 394 appendix. Higher social support score was associated with higher odds of being a non-smoker  
 395 and having a healthy diet among females. Social support score was inversely associated with  
 396 normal cholesterol among women. None of the associations achieved statistical significance  
 397 among men.

398 Table 4 shows the final multivariable models of the relationship between ICH-5 and social  
 399 support score. Again, we present sex-specific models as there was evidence for sex interaction  
 400 in the relationship between ICH-5 and social support score. The models also included age,  
 401 education category, land value and community poverty. Among females, social support score

402 was directly associated with ICH-5, with odds ratio of 1.26 (95%CI 1.04 – 1.53). Age was  
403 significantly associated with ICH-5, odds ratio 0.94 (95% CI 0.91 – 0.97). Females in the upper  
404 category of land value had a significantly higher odds of ICH-5 (2.52; 95% CI 1.06 – 6.03).

405 Among males, social support score was inversely associated with ICH-5, with odds ratio of 0.69  
406 (95%CI 0.54 – 0.88). Age was significantly associated with ICH-5, odds ratio 0.96 (95% CI 0.93 –  
407 0.99). Community poverty was directly associated with ICH-5 among men, middle category  
408 odds ratio 3.87 (95% CI 1.10 – 13.57); upper category odds ratio 2.04 (95% CI 1.04 – 3.98).  
409 There were no significant associations between education category and social support score  
410 among men or women.

411 In order to identify which of the ICH components were driving the observed associations, we  
412 reran the models using the individual ICH components as outcome variables, social support  
413 score as the exposure variable, and adjusting for age and SES variables as done in the final  
414 multivariable model specified above. These results are shown in Table S8 in the appendix.

415 Among women higher social support score was associated with higher odds of having normal  
416 BMI, being a non-smoker and having a healthy diet, but lower odds of having normal  
417 cholesterol. Among men higher social support score was associated with lower odds of being a  
418 non-smoker.

419 We also reran the final model using the dataset with no imputation to assess whether the use  
420 of imputed data would affect our findings or conclusions. These data are shown in Table S9 in  
421 the appendix. Findings in the models without imputations were very similar to those reported  
422 with imputation and would result in similar conclusions.

423 **Table 4: Multivariable model<sup>1</sup> showing the odds of having five or more ideal cardiovascular health characteristics (ICH-5) for males**  
 424 **and females with their corresponding 95% CI and p-value.**

| Variables                  | Females             | P-value | Males               | P-value |
|----------------------------|---------------------|---------|---------------------|---------|
|                            | Odds ratio (95% CI) |         | Odds ratio (95% CI) |         |
| Social Support Score       | 1.26 (1.04 – 1.53)  | 0.020   | 0.69 (0.54 – 0.88)  | 0.005   |
| Age                        | 0.94 (0.91 – 0.97)  | <0.001  | 0.96 (0.93 – 0.99)  | 0.010   |
| Education Category         |                     |         |                     |         |
| Less than High School      | 1.0                 |         | 1.0                 |         |
| High School                | 0.53 (0.11 – 2.61)  | 0.422   | 1.20 (0.45 – 3.2)   | 0.710   |
| More Than High School      | 0.89 (0.25 – 3.24)  | 0.861   | 0.64 (0.18 – 2.27)  | 0.477   |
| Land Value Category        |                     |         |                     |         |
| Lower Category             | 1.0                 |         | 1.0                 |         |
| Middle category            | 1.48 (0.68 – 3.21)  | 0.305   | 0.46 (0.16 – 1.33)  | 0.148   |
| Upper Category             | 2.52 (1.06 – 6.03)  | 0.038   | 2.49 (0.76 – 8.22)  | 0.129   |
| Community Poverty Category |                     |         |                     |         |
| Lower Category             | 1.0                 |         | 1.0                 |         |
| Middle Category            | 1.07 (0.45 – 2.53)  | 0.873   | 3.87 (1.10 – 13.57) | 0.035   |
| Upper Category             | 2.46 (0.93 – 6.50)  | 0.069   | 2.04 (1.04 – 3.98)  | 0.038   |

425 <sup>1</sup>Separate models created for males and females with ICH-5 as outcome, social support score and main exposure variable and adjusting for age,  
 426 education, median land value and community poverty. Models were weighted for survey design and used multiple imputation.

## 427 **DISCUSSION**

428 We have found that higher levels of social support, specifically larger number of friends, is  
429 inversely associated with ICH among males, but directly associated among women in urban  
430 Jamaica. Men had larger networks than women. Overall prevalence of ICH was low with  
431 none of the participants having optimal levels of all seven characteristics and only  
432 approximately a quarter of participants having five or more components. We also found  
433 that men in poorer communities were more likely to have five or more ICH components  
434 while women in communities with higher median property value were more likely to have  
435 five or more ICH components. These findings suggest that ICH was directly associated with  
436 social support and socioeconomic status among urban women in Jamaica, while on the  
437 contrary, ICH was inversely associated with social support and SES among Jamaican men.

438 Our findings with regards to the prevalence of ICH is consistent with previous studies. We  
439 previously reported a 23% prevalence for ICH among adults 20 years and older in a national  
440 urban sample (12). In a Swiss study, the prevalence of three or more ICH characteristics was  
441 found to be 54%, while in a study in Peru only 12.7% had 5 or more ICH characteristics and  
442 no one had all 7 ICH characteristics (47, 48). Similar to our findings, the study from Peru  
443 found that persons in the lower SES regions had higher percentage of ICH prevalence (48). In  
444 other studies prevalence of five or more ICH characteristics ranged from 3.9% among men in  
445 Mississippi to 36.9% in Quebec (12). With regards to social network size mean number of  
446 friends reported in our study was lower than that reported among US Latinos, where Viruell-  
447 Fuentes (34) reported mean sizes of 6, 5 and 5 for social network size, instrumental support  
448 and information support compared to median values of 4, 3 and 4 in our study.

449 One factor contributing to the low prevalence of cardiovascular health factors in Jamaica  
450 and other countries is the obesogenic environment, characterised by limited access to  
451 healthy foods and limited space for physical activity (49-54). In Jamaica, Cunningham-Myrie  
452 and colleagues found that greater street connection density was associated with increased  
453 BMI among men and increased waist circumference was associated with increased distance  
454 from public parks among persons in the middle SES groups (49). Additionally, further  
455 distance away from supermarkets was associated with higher mean BMI among women  
456 (52). Guo and colleagues found that persons living in more obesogenic environments had

457 greater odds of cardiovascular disease and were more likely to engage in unhealthy  
458 behaviours (54). These studies suggest that efforts to improve cardiovascular health in  
459 Jamaica and similar populations should include measures to make the environment more  
460 conducive to healthy lifestyles.

461 We did not find many studies looking at social support and cardiovascular health, but in one  
462 study among US Latinos, Murillo and colleagues (55) found that larger central family size  
463 was associated with lower odds of healthy BMI and lower odds of having five healthy  
464 lifestyle factors (favourable BMI, physical activity, diet, alcohol use, smoking), while having a  
465 larger number of extended family members they felt close to was associated with higher  
466 odds of healthy BMI and being a non-smoker. While the findings among men in our study  
467 may seem counterintuitive, it is consistent with previous studies from our group showing  
468 higher prevalence of some cardiovascular disease risk factors among men (56, 57). In these  
469 studies, obesity and metabolic syndrome were more prevalent among higher SES men. In  
470 contrast with the association with obesity and the metabolic syndrome, cigarette smoking  
471 was more prevalent among lower SES men (58). While there has been an increasing body of  
472 work on social networks and cardiovascular disease, Child and Albert reported that there  
473 has been very little work in Black populations (59). They further suggest that there may be  
474 important differences in the structure and function of social networks in Black populations.  
475 The findings from our study supports this notion and suggest that further research is  
476 necessary to advance our understanding in this field.

477 Gender differences in associations between social factors and health outcomes is a  
478 consistent finding in studies from Jamaica (12, 56, 60-62). The precise aetiology is still  
479 unsure but may be related to differences in the determinants of behavioural risk factors  
480 such as smoking, diet, and physical activity. Physical activity tends to be higher in lower SES  
481 males who are more likely to be employed in manual jobs and to use more active forms of  
482 transportation than higher SES males. Lower SES males are also less likely to consume highly  
483 processed foods and high fat foods. This leads to lower levels of obesity among lower SES  
484 males. On the other hand, higher SES women may be more likely to engage in leisure time  
485 physical activity and may be able to afford more healthy diets. Tobacco smoking is usually  
486 higher among lower SES men.

487 Gender differences in the impact of social support on ICH seems to be driven largely by  
488 differences in smoking behaviour and healthy diet. Higher social support was associated  
489 with higher odds of non-smoking and healthy diets among females, whereas the opposite  
490 seems to be true among men. It is likely that men with large social networks engage in more  
491 unhealthy behaviours whereas for women large social networks leads to more healthy  
492 behaviours.

493 With regards to the mechanisms linking social support and cardiovascular health, a number  
494 of studies have reviewed this relationship and have suggested pathways between social  
495 support and disease morbidity and mortality (17, 23, 63, 64). Social support may influence  
496 health outcomes and contribute to better mental health and may also act as a buffer to  
497 stressful chronic conditions (23, 64). A study by Bostean and colleagues highlighted that  
498 protective effects of social support from family and friends coupled with neighbourhood  
499 characteristics influences mental health by acting as a buffer to stressful life events (65).  
500 Research has also revealed that social support possesses the ability to encourage positive  
501 reframing, thus reducing the stress (66). Such stress may lead to high blood pressure which  
502 increases the risk of heart attack and stroke (67) . Additionally, Uchino and colleagues have  
503 found that higher levels of supportive family members was associated with lower hs-CRP,  
504 while higher numbers of ambivalent family members was associated with higher hs-CRP  
505 suggesting that social support may impact health through effects on inflammatory pathways  
506 (28). Work by Kim and Thomas also reports lower levels of inflammation in persons with  
507 high social support thus supporting a role for inflammatory pathways in the mechanisms  
508 underlying social support and health (64). Uchino also reported that social support has been  
509 linked to various cardiovascular, neuroendocrine, and immune system mechanisms which  
510 may lead to beneficial effects of social support on health. The perceived availability of social  
511 support may contribute to a positive sense of self, thus encouraging the accomplishment of  
512 personal task and influence behaviours (64). These support systems may play an integral  
513 role in guiding individuals towards a level of optimum social performance since social  
514 support may manifest as ensuring one eats properly, exercise, avoid smoking and engage in  
515 other beneficial health behaviours.

516 We believe that this study contributes to the growing body of literature on the role of social  
517 support in health and helps to fill the research gap related to social support in Black

518 populations. This study should also serve as a catalyst for more research in this field. The  
519 study also contributes to our understanding of the social determinants of health in a  
520 developing country context and highlights the need to assess gender differences and the  
521 need to consider sex-specific approaches when developing interventions to improve  
522 cardiovascular health.

523 Strengths of this study includes the following. The study sample is representative of urban  
524 communities in the Southeast region of Jamaica, which is the most populous areas of the  
525 country. The study used survey weights to ensure that estimates were representative of the  
526 region study. To our knowledge, this is the first study to evaluate the association between  
527 social support and cardiovascular health in the Jamaican context. We acknowledge however  
528 that some data were self-reported and as such may be subject to recall or reporting bias;  
529 however, we used standard questionnaire administration procedure to minimise these  
530 biases. We also note that the sample included more women compared to men as is  
531 commonly seen in local health surveys. Our use of survey weights would correct for this  
532 anomaly. We also note that we had missing data for some variables, but we were able to  
533 use multiple imputation to handle missing data, thus minimizing potential loss of power and  
534 minimising bias. We were also able to show that the findings limited to participants with no  
535 missing data yielded similar results, so we are confident the use of imputation did not  
536 influence our findings or conclusions. Additionally, we did not have data on the quality of  
537 social support, hence could not determine whether this influenced the observed  
538 associations. Another limitation is that we did not have data on sleep duration and  
539 therefore could not include this in our cardiovascular health metric. We also acknowledge  
540 that given the cross-sectional study design we are not able to definitively establish temporal  
541 relationships between the exposure outcomes so we cannot make causal inferences.

## 542 ***Conclusion***

543 The association between social support score and ICH characteristics varies by sex, with an  
544 inverse association among men and positive association among women. Women living in  
545 communities with high property value were more likely to have ICH, while men living in  
546 poorer communities were more likely to have ICH. These findings suggest that gender  
547 specific approaches may be needed when designing social interventions to improve  
548 cardiovascular health.

## 549 **Acknowledgements**

550

551 The authors would like to thank the Harvard T H Chan School of Public Health Lown Scholars  
552 Program for the grant and general support. The authors also thank the National Land  
553 Agency (NLA) for providing the property value data and the Statistical Institute of Jamaica  
554 (STATIN) for providing the shapefile. The authors would also like to thank the Ministry of  
555 Health and Wellness and the National Health Fund Jamaica, which provided funding for the  
556 Jamaica Health and Lifestyle Survey III in 2016/2017. They also would like to thank the  
557 Geoinformation Unit from both STATIN and NLA. Thanks to the JHLS III field staff, JHLS III  
558 participants and the CAIHR/ERU administrative staff and the unit driver for their support.

559

## 560 **Funding**

561 Funding for this study was provided by the Bernard Lown Scholar program, (grant number:  
562 BLSCHP-1604). Sponsor's Website: <https://www.hsph.harvard.edu/lownscholars/>. The grant  
563 was awarded to TSF. The funders had no role in study design, data collection and analysis,  
564 decision to publish, or preparation of the manuscript.



## REFERENCES

565

- 566 1. Heidenreich PA, Trogon JG, Khavjou OA, Butler J, Dracup K, Ezekowitz MD, et al. Forecasting  
567 the future of cardiovascular disease in the United States: a policy statement from the  
568 American Heart Association. *Circulation*. 2011;123(8):933-44.
- 569 2. Alam MT, Echeverria SE, DuPont-Reyes MJ, Vasquez E, Murillo R, Gonzalez T, et al. Educational  
570 Attainment and Prevalence of Cardiovascular Health (Life's Simple 7) in Asian Americans. *Int J*  
571 *Environ Res Public Health*. 2021;18(4).
- 572 3. Roth GA, Mensah GA, Johnson CO, Addolorato G, Ammirati E, Baddour LM, et al. Global  
573 Burden of Cardiovascular Diseases and Risk Factors, 1990-2019: Update From the GBD 2019  
574 Study. *J Am Coll Cardiol*. 2020;76(25):2982-3021.
- 575 4. NCD Alliance. Cardiovascular Diseases 2022 [updated September 29 2022. Available from:  
576 <https://ncdalliance.org/why-ncds/ncds/cardiovascular-diseases>.
- 577 5. Madavanakadu Devassy S, Webber M, Scaria L, Amuthavalli Thiyagarajan J, Fendt-Newlin M,  
578 Joubert J, et al. Social and behavioural risk factors in the prevention and management of  
579 cardiovascular disease in Kerala, India: a catchment area population survey. *BMC Cardiovasc*  
580 *Disord*. 2020;20(1):327.
- 581 6. Aranco N. Panorama of Aging and Long-term Care: Latin America and the Caribbean is Aging |  
582 Publications Publications.iadb.org2019 [Available from:  
583 [https://publications.iadb.org/publications/english/document/Panorama\\_of\\_Aging\\_and\\_Long-](https://publications.iadb.org/publications/english/document/Panorama_of_Aging_and_Long-term_Care_Latin_America_and_the_Caribbean_is_Aging_en_en.pdf)  
584 [term\\_Care\\_Latin\\_America\\_and\\_the\\_Caribbean\\_is\\_Aging\\_en\\_en.pdf](https://publications.iadb.org/publications/english/document/Panorama_of_Aging_and_Long-term_Care_Latin_America_and_the_Caribbean_is_Aging_en_en.pdf).
- 585 7. Association AH. Life's Simple 7 2022 [Available from: [https://playbook.heart.org/lifes-simple-](https://playbook.heart.org/lifes-simple-7/)  
586 [7/](https://playbook.heart.org/lifes-simple-7/).
- 587 8. Lloyd-Jones DM, Hong Y, Labarthe D, Mozaffarian D, Appel LJ, Van Horn L, et al. Defining and  
588 setting national goals for cardiovascular health promotion and disease reduction: the  
589 American Heart Association's strategic Impact Goal through 2020 and beyond. *Circulation*.  
590 2010;121(4):586-613.
- 591 9. Ford ES, Greenlund KJ, Hong Y. Ideal cardiovascular health and mortality from all causes and  
592 diseases of the circulatory system among adults in the United States. *Circulation*.  
593 2012;125(8):987-95.
- 594 10. Ford ES. Ideal Cardiovascular Health. *Circulation*. 2012;125(16):1955-7.
- 595 11. Lloyd-Jones DM, Allen NB, Anderson CAM, Black T, Brewer LC, Foraker RE, et al. Life's Essential  
596 8: Updating and Enhancing the American Heart Association's Construct of Cardiovascular  
597 Health: A Presidential Advisory From the American Heart Association. *Circulation*.  
598 2022;146(5):e18-e43.

- 599 12. McKenzie JA, Younger NO, Tulloch-Reid MK, Govia I, Bennett NR, McFarlane S, et al. Ideal  
600 cardiovascular health in urban Jamaica: prevalence estimates and relationship to community  
601 property value, household assets and educational attainment: a cross-sectional study. *BMJ*  
602 *open*. 2020;10(12):e040664.
- 603 13. Jankovic J, Davidovic M, Bjegovic-Mikanovic V, Jankovic S. Status of cardiovascular health in  
604 the Republic of Serbia: Results from the National Health Survey. *PLoS One*.  
605 2019;14(3):e0214505.
- 606 14. Pengpid S, Peltzer K. Ideal Cardiovascular Health in a Nationally Representative Population-  
607 Based Sample of Adults in Malawi. *Glob Heart*. 2021;16(1):24.
- 608 15. Gottlieb BH, Bergen AE. Social support concepts and measures. *J Psychosom Res*.  
609 2010;69(5):511-20.
- 610 16. Ochoa CY, Haardörfer R, Escoffery C, Stein K, Alcaraz KI. Examining the role of social support  
611 and spirituality on the general health perceptions of Hispanic cancer survivors.  
612 *Psychooncology*. 2018;27(9):2189-97.
- 613 17. Uchino BN, Cronan S, Scott E, Landvatter J, Papadakis M. Social support and stress,  
614 depression, and cardiovascular disease. In: Chantler PD, Larkin KT, editors. *Cardiovascular*  
615 *Implications of Stress and Depression*: Academic Press; 2020. p. 211-23.
- 616 18. Goldman AW. All in the family: The link between kin network bridging and cardiovascular risk  
617 among older adults. *Social science & medicine (1982)*. 2016;166:137-49.
- 618 19. Strom JL, Egede LE. The impact of social support on outcomes in adult patients with type 2  
619 diabetes: a systematic review. *Curr Diab Rep*. 2012;12(6):769-81.
- 620 20. Harvey IS, Story CR, Knutson D, Whitt-Glover MC. Exploring the Relationship of Religiosity,  
621 Religious Support, and Social Support Among African American Women in a Physical Activity  
622 Intervention Program. *J Relig Health*. 2016;55(2):495-509.
- 623 21. Arthur HM. Depression, isolation, social support, and cardiovascular disease in older adults. *J*  
624 *Cardiovasc Nurs*. 2006;21(5 Suppl 1):S2-7; quiz S8-9.
- 625 22. Tengku Mohd TAM, Yunus RM, Hairi F, Hairi NN, Choo WY. Social support and depression  
626 among community dwelling older adults in Asia: a systematic review. *BMJ open*.  
627 2019;9(7):e026667-e.
- 628 23. Uchino B. Social Support and Health: A Review of Physiological Processes Potentially  
629 Underlying Links to Disease Outcomes. *J Behav Med*. 2006;29:377-87.
- 630 24. Bobdey S, Pawar AA, Sarkar R. An assessment of perceived social support among naval  
631 personnel. *Medical journal, Armed Forces India*. 2020;76(2):213-6.

- 632 25. Barrera Jr. M. Distinctions between social support concepts, measures, and models. *Am J*  
633 *Community Psychol.* 1986;14(4):413-45.
- 634 26. Berkman L, Krishna A. Social Network Epidemiology. *Social Epidemiology.* 2014:234-89.
- 635 27. Singh R, Javed Z, Yahya T, Valero-Elizondo J, Acquah I, Hyder AA, et al. Community and Social  
636 Context: An Important Social Determinant of Cardiovascular Disease. *Methodist Debakey*  
637 *Cardiovasc J.* 2021;17(4):15-27.
- 638 28. Uchino BN, Ruiz JM, Smith TW, Smyth JM, Taylor DJ, Allison M, et al. The Strength of Family  
639 Ties: Perceptions of Network Relationship Quality and Levels of C-Reactive Proteins in the  
640 North Texas Heart Study. *Ann Behav Med.* 2015;49(5):776-81.
- 641 29. Nagayoshi M, Everson-Rose SA, Iso H, Mosley TH, Jr., Rose KM, Lutsey PL. Social network,  
642 social support, and risk of incident stroke: Atherosclerosis Risk in Communities study. *Stroke.*  
643 2014;45(10):2868-73.
- 644 30. Harding BN, Hawley CN, Kalinowski J, Sims M, Muntner P, Young Mielcarek BA, et al.  
645 Relationship between social support and incident hypertension in the Jackson Heart Study: a  
646 cohort study. *BMJ open.* 2022;12(3):e054812-e.
- 647 31. Ferguson T, Tulloch-Reid M, Younger N, Govia I, Wilks R, Williams D. Cardiovascular health in  
648 urban poor and middle income communities in Jamaica: impact of psychosocial stress, social  
649 networks, and social support 2017.
- 650 32. Kish L. A Procedure for Objective Respondent Selection within the Household. *Journal of the*  
651 *American Statistical Association.* 1949;44(247):380-7.
- 652 33. House JS, Kaplan GA, Morenoff J, Raudenbush SW, Williams DR, Young EA. Chicago  
653 Community Adult Health Study, 2001-2003. Inter-university Consortium for Political and Social  
654 Research [distributor]; 2012. DOI: <https://doi.org/10.3886/ICPSR31142.v1>
- 655 34. Viruell-Fuentes EA, Morenoff JD, Williams DR, House JS. Contextualizing nativity status, Latino  
656 social ties, and ethnic enclaves: an examination of the 'immigrant social ties hypothesis'. *Ethn*  
657 *Health.* 2013;18(6):586-609.
- 658 35. Ataman SL, Cooper R, Rotimi C, McGee D, Osotimehin B, Kadiri S, et al. Standardization of  
659 blood pressure measurement in an international comparative study. *J Clin Epidemiol.*  
660 1996;49(8):869-77.
- 661 36. Planning Institute of Jamaica, Statistical Institute of Jamaica. Mapping Poverty Indicators:  
662 Consumption Based Poverty In Jamaica. In: Jamaica PloJaSlo, editor. Kingston, Jamaica:  
663 Planning institute of Jamaica; 2019.
- 664 37. Chaudhuri A. Survey Sampling. Chapman and Hall/CRC; 2010. p. 146.
- 665 38. Lorh S. Sampling: Design and Analysis. Pacific Grove, CA: Duxbury Press; 1999.

- 666 39. Wilks R, Younger N, Tulloch-Reid M, McFarlane S, Francis D. Jamaica Health and Lifestyle  
667 Survey 2007-8. The University of the West Indies, Epidemiology Research Unit TMRI; 2008  
668 2008.
- 669 40. Hair J BB, Babin B, Anderson R, Tatham R. Multivariate Data Analysis. 6th edition. Upper  
670 Saddle River: N.J.: Pearson; 2006.
- 671 41. Dinno A. Implementing Horn's Parallel Analysis for Principal Component Analysis and Factor  
672 Analysis. The Stata Journal. 2009;9(2):291-8.
- 673 42. Hayton JC, Allen DG, Scarpello V. Factor Retention Decisions in Exploratory Factor Analysis: a  
674 Tutorial on Parallel Analysis. Organizational Research Methods. 2004;7(2):191-205.
- 675 43. Wilks R, Younger N, Mullings J, Zohoori N, Figueroa P, Tulloch-Reid M, et al. Factors affecting  
676 study efficiency and item non-response in health surveys in developing countries: the Jamaica  
677 national healthy lifestyle survey. BMC Med Res Methodol. 2007;7:13.
- 678 44. The Jamaica Health and Lifestyle Survey Writing Team. The Jamaica Health and Lifestyle  
679 Survey III (2016 – 2017). Kingston: Ministry of Health and Wellness, Jamaica and The  
680 Caribbean Institute of Health Research, The University of the West Indies.; 2024. Contract  
681 No.: ISBN 9789768266956 (pbk).
- 682 45. StataCorp. Stata Glossary and Index: Release 16. College Station, Texas: StataCorp LLC; 2019.
- 683 46. Graham JW, Olchowski AE, Gilreath TD. How many imputations are really needed? Some  
684 practical clarifications of multiple imputation theory. Prev Sci. 2007;8(3):206-13.
- 685 47. Schoenenberger AW, Radovanovic D, Muggli F, Suter PM, Schoenenberger-Berzins R, Parati G,  
686 et al. Prevalence of ideal cardiovascular health in a community-based population - results  
687 from the Swiss Longitudinal Cohort Study (SWICOS). Swiss Med Wkly. 2021;151:w30040.
- 688 48. Benziger CP, Zavala-Loayza JA, Bernabe-Ortiz A, Gilman RH, Checkley W, Smeeth L, et al. Low  
689 prevalence of ideal cardiovascular health in Peru. Heart. 2018;104(15):1251-6.
- 690 49. Cunningham-Myrie C, Theall KP, Younger-Coleman N, Greene LG, Lyew-Ayee P, Wilks R.  
691 Associations of neighborhood physical and crime environments with obesity-related outcomes  
692 in Jamaica. PLoS One. 2021;16(4):e0249619.
- 693 50. Cunningham-Myrie C, Theall KP, Younger-Coleman N, Wiggan J, McFarlane S, Francis D, et al.  
694 Who moves in vulnerable Caribbean neighborhoods? Positive deviance for physical activity:  
695 Findings from the Jamaica health and Lifestyle Survey 2017 (JHLS III). Prev Med Rep.  
696 2022;30:101998.
- 697 51. Cunningham-Myrie CA, Theall KP, Younger NO, Mabile EA, Tulloch-Reid MK, Francis DK, et al.  
698 Associations between neighborhood effects and physical activity, obesity, and diabetes: The  
699 Jamaica Health and Lifestyle Survey 2008. J Clin Epidemiol. 2015;68(9):970-8.

- 700 52. Cunningham-Myrie CA, Younger NO, Theall KP, Greene LG, Lyew-Ayee P, Wilks R.  
701 Understanding neighbourhood retail food environmental mechanisms influencing BMI in the  
702 Caribbean: a multilevel analysis from the Jamaica Health and Lifestyle Survey: a cross-sectional  
703 study. *BMJ Open*. 2020;10(8):e033839.
- 704 53. Cheema BS, Shi Z, White RL, Atlantis E. Associations of Recreational and Nonrecreational  
705 Physical Activity and Body Weight Change on Cardiovascular Disease Mortality During the  
706 Obesogenic Transition in the United States: National Health and Nutrition Examination Survey  
707 Follow-up Study. *J Phys Act Health*. 2023;20(10):971-9.
- 708 54. Guo F, Bostean G, Berardi V, Velasquez AJ, Robinette JW. Obesogenic environments and  
709 cardiovascular disease: a path analysis using US nationally representative data. *BMC Public*  
710 *Health*. 2022;22(1):703.
- 711 55. Murillo R, Pirzada A, Wu D, Gallo LC, Davis S, Ostrovsky NW, et al. The Association Between  
712 Family Social Network Size and Healthy Lifestyle Factors: Results from the Hispanic  
713 Community Health Study/Study of Latinos (HCHS/SOL). *J Behav Med*. 2020;43(2):198-208.
- 714 56. Ferguson TS, Younger N, Tulloch-Reid MK, Forrester TE, Cooper RS, Van den Broeck J, et al.  
715 Prevalence of the metabolic syndrome in Jamaican adults and its relationship to income and  
716 education levels. *West Indian Med J*. 2010;59(3):265-73.
- 717 57. Mendez MA, Cooper RS, Luke A, Wilks R, Bennett F, Forrester T. Higher income is more  
718 strongly associated with obesity than with obesity-related metabolic disorders in Jamaican  
719 adults. *IntJ ObesRelat Metab Disord*. 2004;28(4):543-50.
- 720 58. Bennett NR, Ferguson TS, Younger-Coleman NO, Francis DK, Anderson SG, Harris EN, et al.  
721 Socioeconomic and gender disparities in tobacco smoking among Jamaican adults from a  
722 national health survey. *medRxiv*. 2021:2021.01.04.21249206.
- 723 59. Child ST, Albert MA. Social Networks and Health Outcomes: Importance for racial and  
724 socioeconomic disparities in cardiovascular outcomes. *Curr Cardiovasc Risk Rep*. 2018;12(12).
- 725 60. Ferguson T, Younger-Coleman N, Tulloch-Reid M, Hambleton I, MacLeish M, Hennis A, et al.  
726 Educational Health Disparities in Cardiovascular Disease Risk Factors in Jamaica: Findings from  
727 the Jamaica Health and Lifestyle Surveys. *West Indian Med J*. 2013;62(Suppl 2):31.
- 728 61. Ferguson TS, Younger-Coleman NO, Tulloch-Reid MK, Knight-Madden JM, Bennett NR, Samms-  
729 Vaughan M, et al. Birth weight and maternal socioeconomic circumstances were inversely  
730 related to systolic blood pressure among Afro-Caribbean young adults. *J Clin Epidemiol*.  
731 2015;68(9):1002-9.

- 732 62. Ferguson TS, Younger-Coleman NOM, Mullings J, Francis D, Greene L-G, Lyew-Ayee P, et al.  
733 Neighbourhood socioeconomic characteristics and blood pressure among Jamaican youth: a  
734 pooled analysis of data from observational studies. *PeerJ*. 2020;8:e10058.
- 735 63. Barth J, Schneider S, von Känel R. Lack of social support in the etiology and the prognosis of  
736 coronary heart disease: a systematic review and meta-analysis. *Psychosom Med*.  
737 2010;72(3):229-38.
- 738 64. Kim S, Thomas PA. Direct and Indirect Pathways From Social Support to Health? *J Gerontol B*  
739 *Psychol Sci Soc Sci*. 2019;74(6):1072-80.
- 740 65. Bostean G, Andrade FCD, Viruell-Fuentes EA. Neighborhood stressors and psychological  
741 distress among U.S. Latinos: Measuring the protective effects of social support from family  
742 and friends. *Stress Health*. 2019;35(2):115-26.
- 743 66. Campos B, Ullman JB, Aguilera A, Dunkel Schetter C. Familism and psychological health: the  
744 intervening role of closeness and social support. *Cultur Divers Ethnic Minor Psychol*.  
745 2014;20(2):191-201.
- 746 67. Tawakol A, Ishai A, Takx RA, Figueroa AL, Ali A, Kaiser Y, et al. Relation between resting  
747 amygdalar activity and cardiovascular events: a longitudinal and cohort study. *Lancet*.  
748 2017;389(10071):834-45.

749

750

751

752

753

754

755

756

757

758

759

760

761 **Figure Legends**

762 Figure 1 – Boxplot with median and interquartile range for number of friends willing to give  
763 advice (A), number of friends overall (B), number of friends willing to provide a loan (C) for  
764 males and females.

765

766 Figure 2 – Proportion of participants with 0-7 Ideal Cardiovascular Health Components (A)  
767 and proportion of participants with  $\geq 1$ ,  $\geq 2$ ,  $\geq 3$ ,  $\geq 4$ ,  $\geq 5$ ,  $\geq 6$  or 7 Ideal Cardiovascular Health  
768 Components (B)

769

(A) Who Give Advice

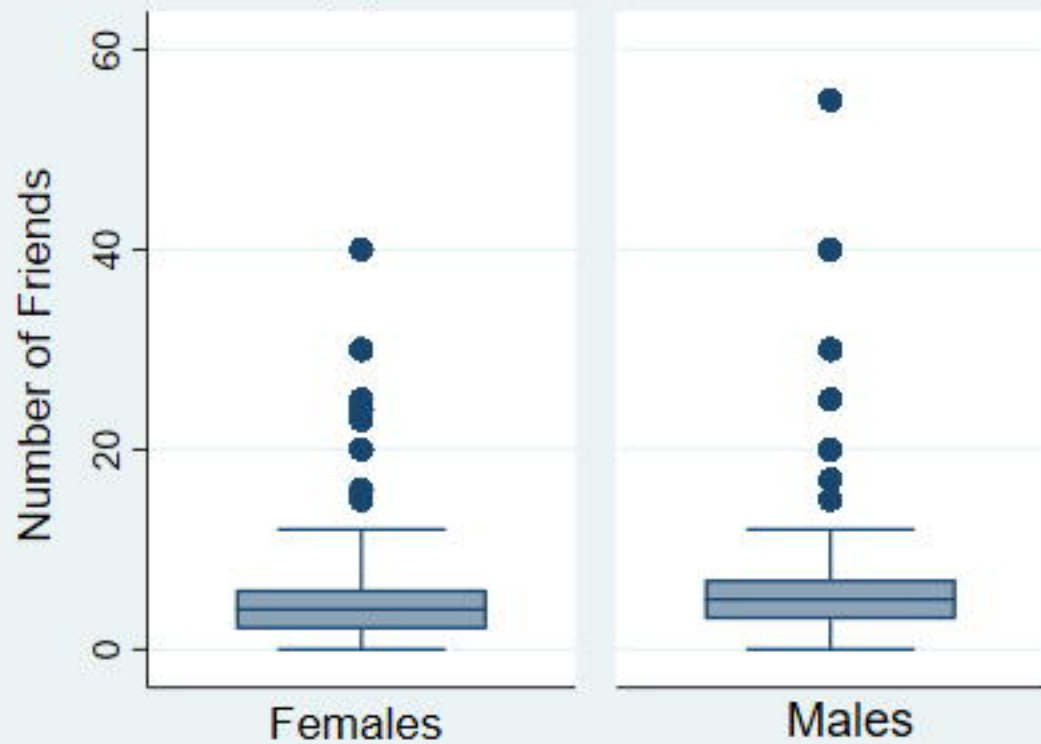

(B) In My Network

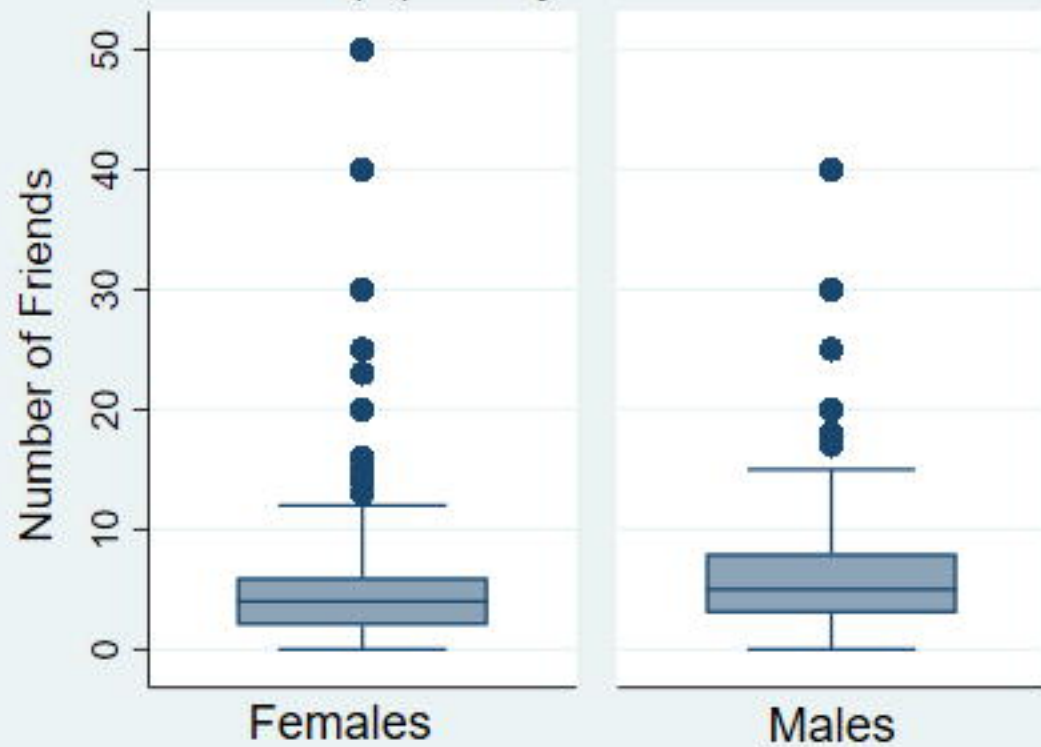

(C) Who Lend (Me) Money

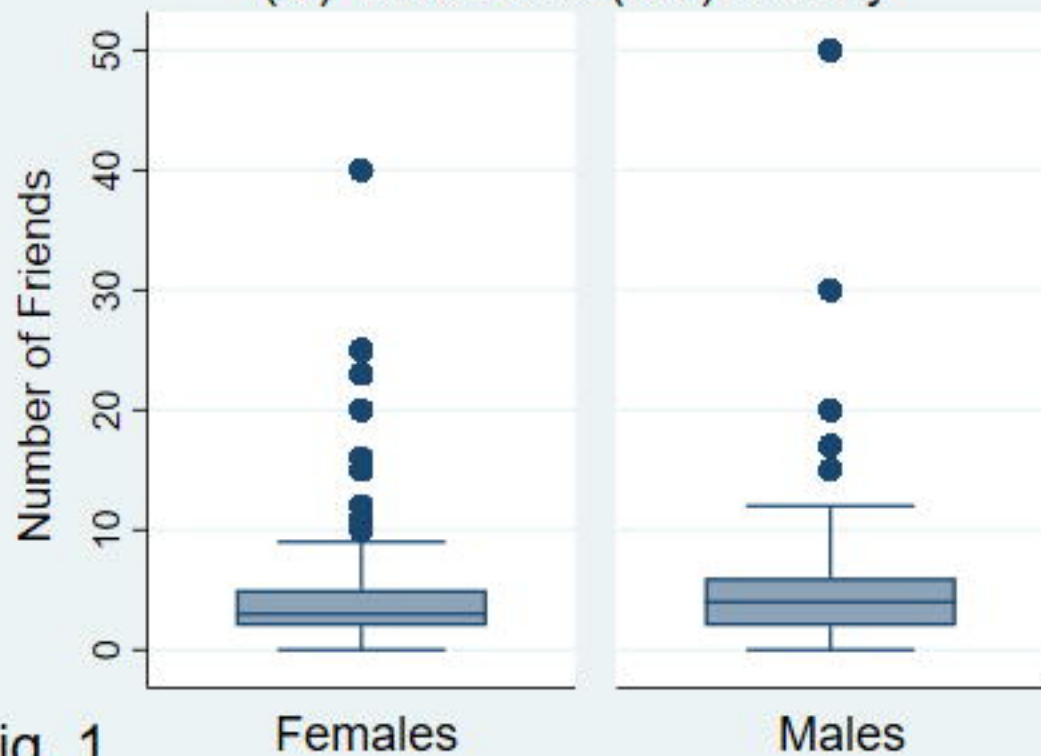

Fig. 1



(A) Percentage with 0 - 7 ICH Components

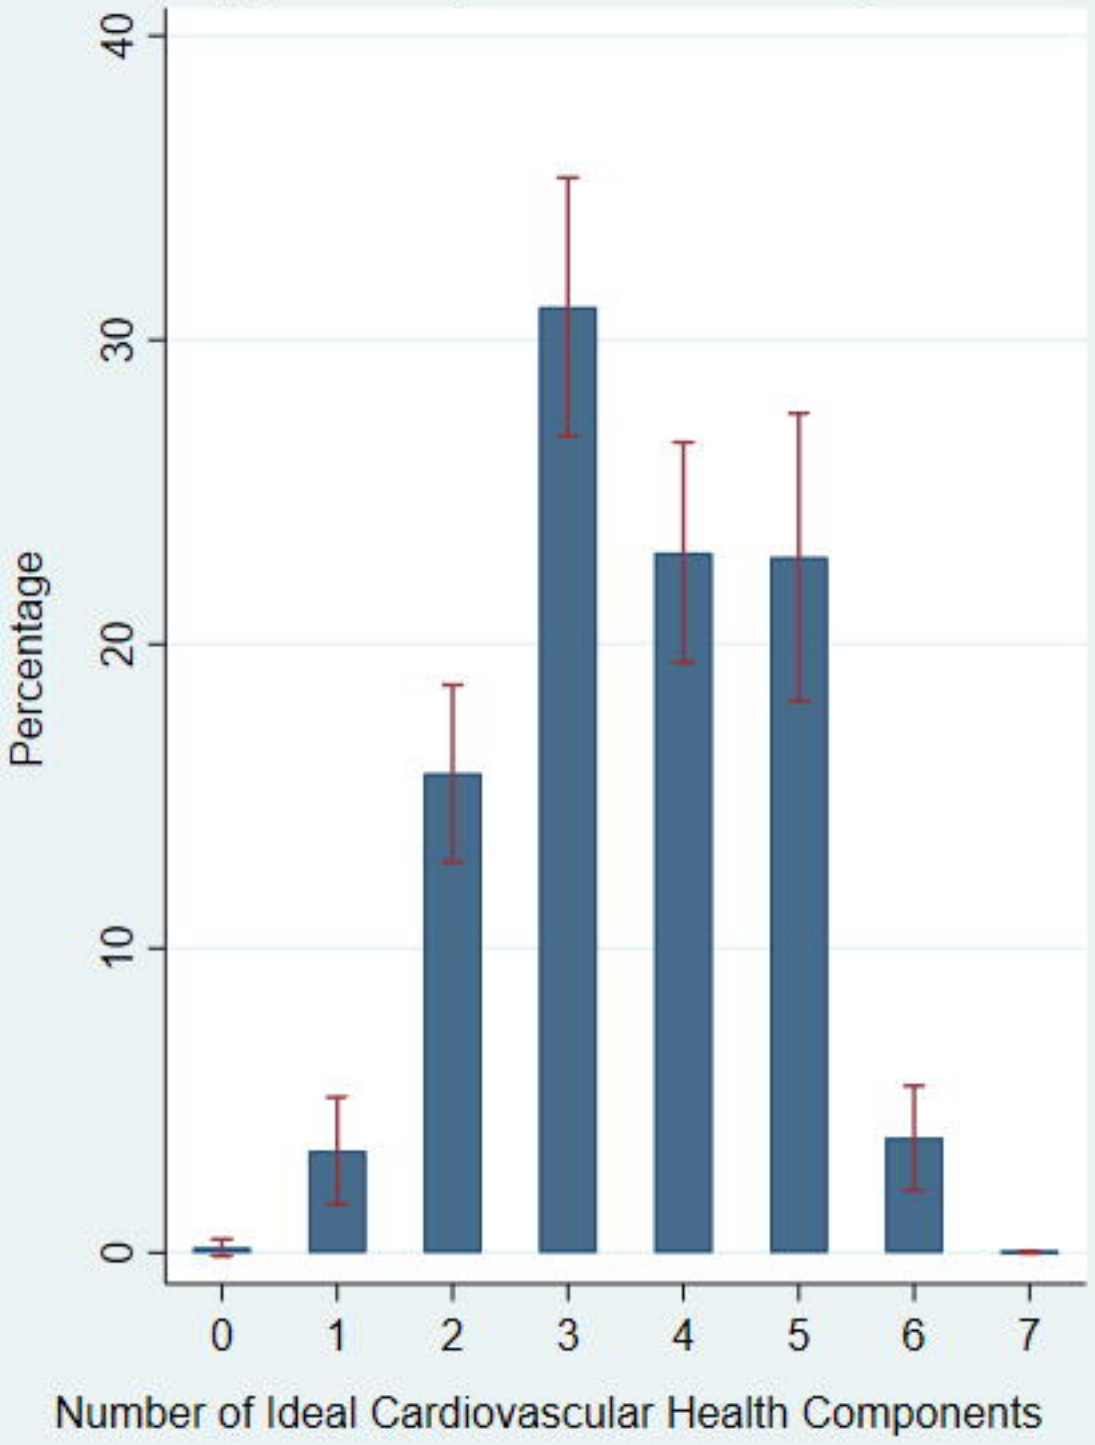

(B) Percentage with  $\geq 1$  up to 7 ICH Components

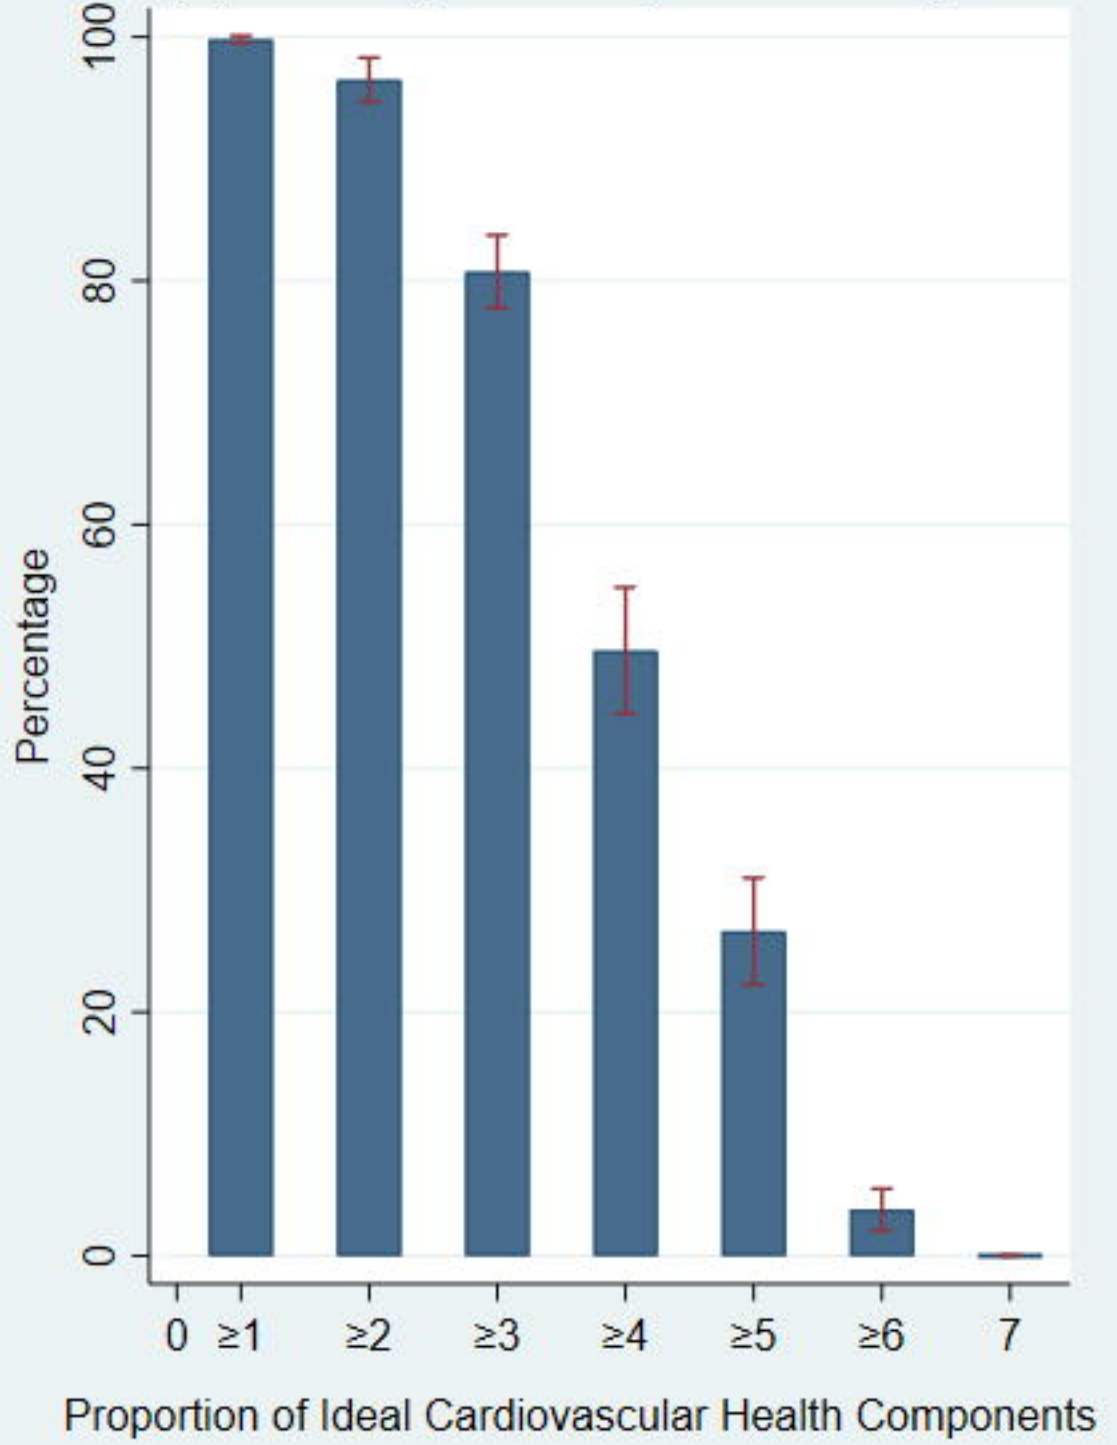

Percentage upper/lower limit

Percentage upper/lower limit

Fig. 2
